# Supplementary material
Source: PubMed Central journal article supplement (PMC5136472)

Figure S1

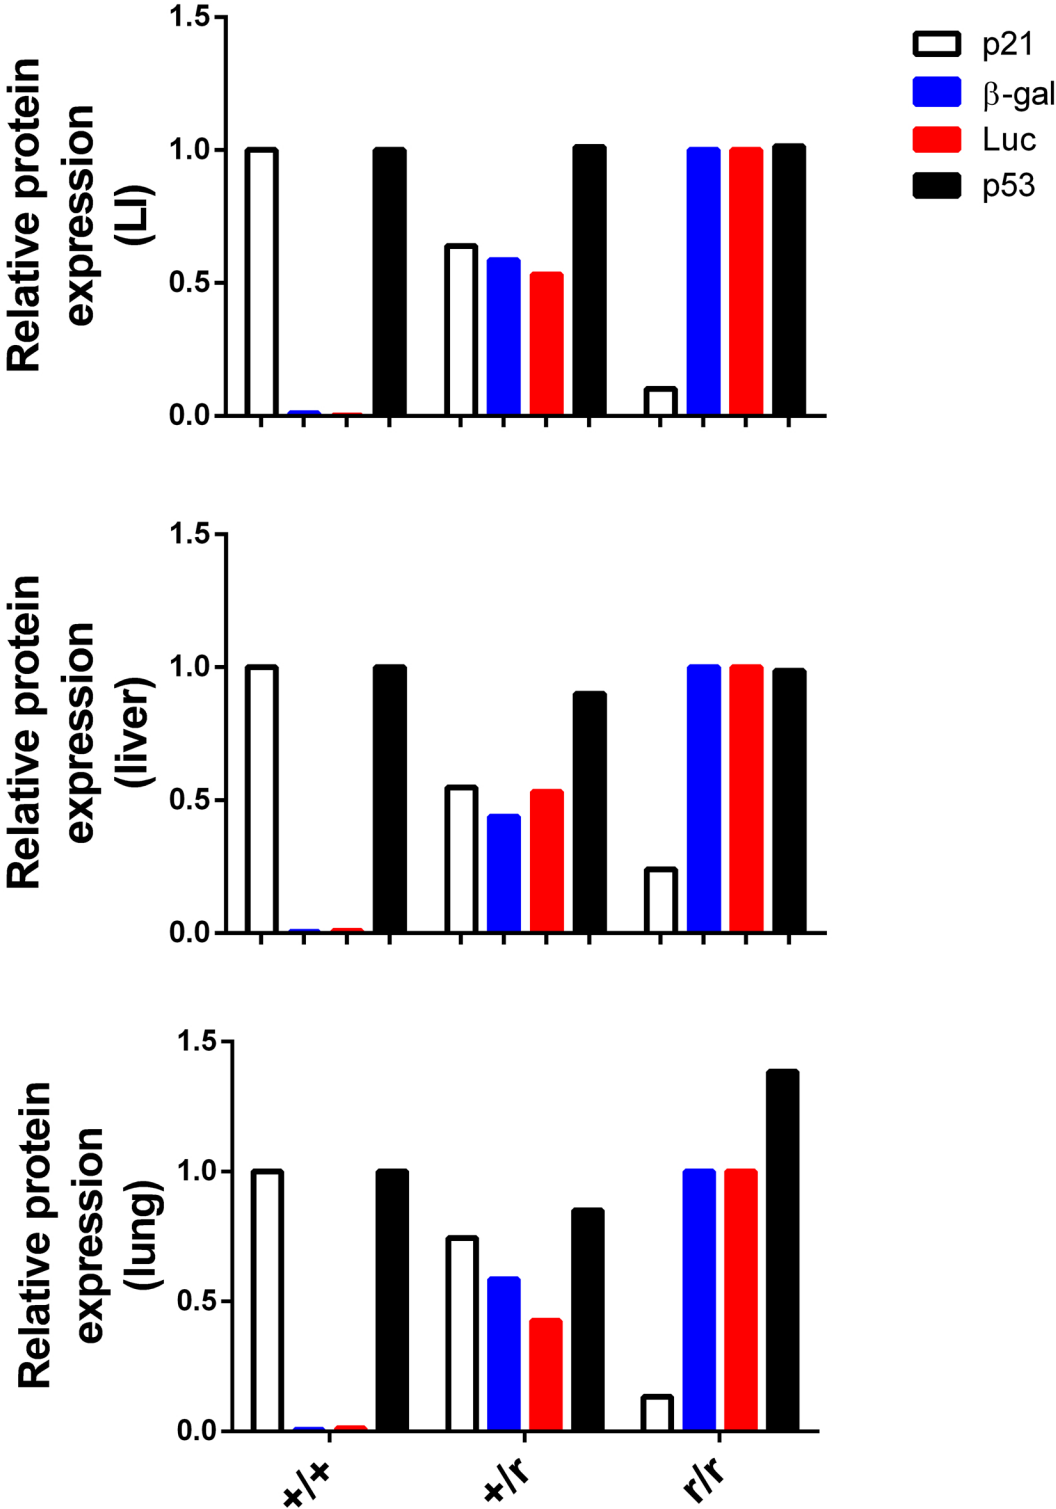

Figure S2

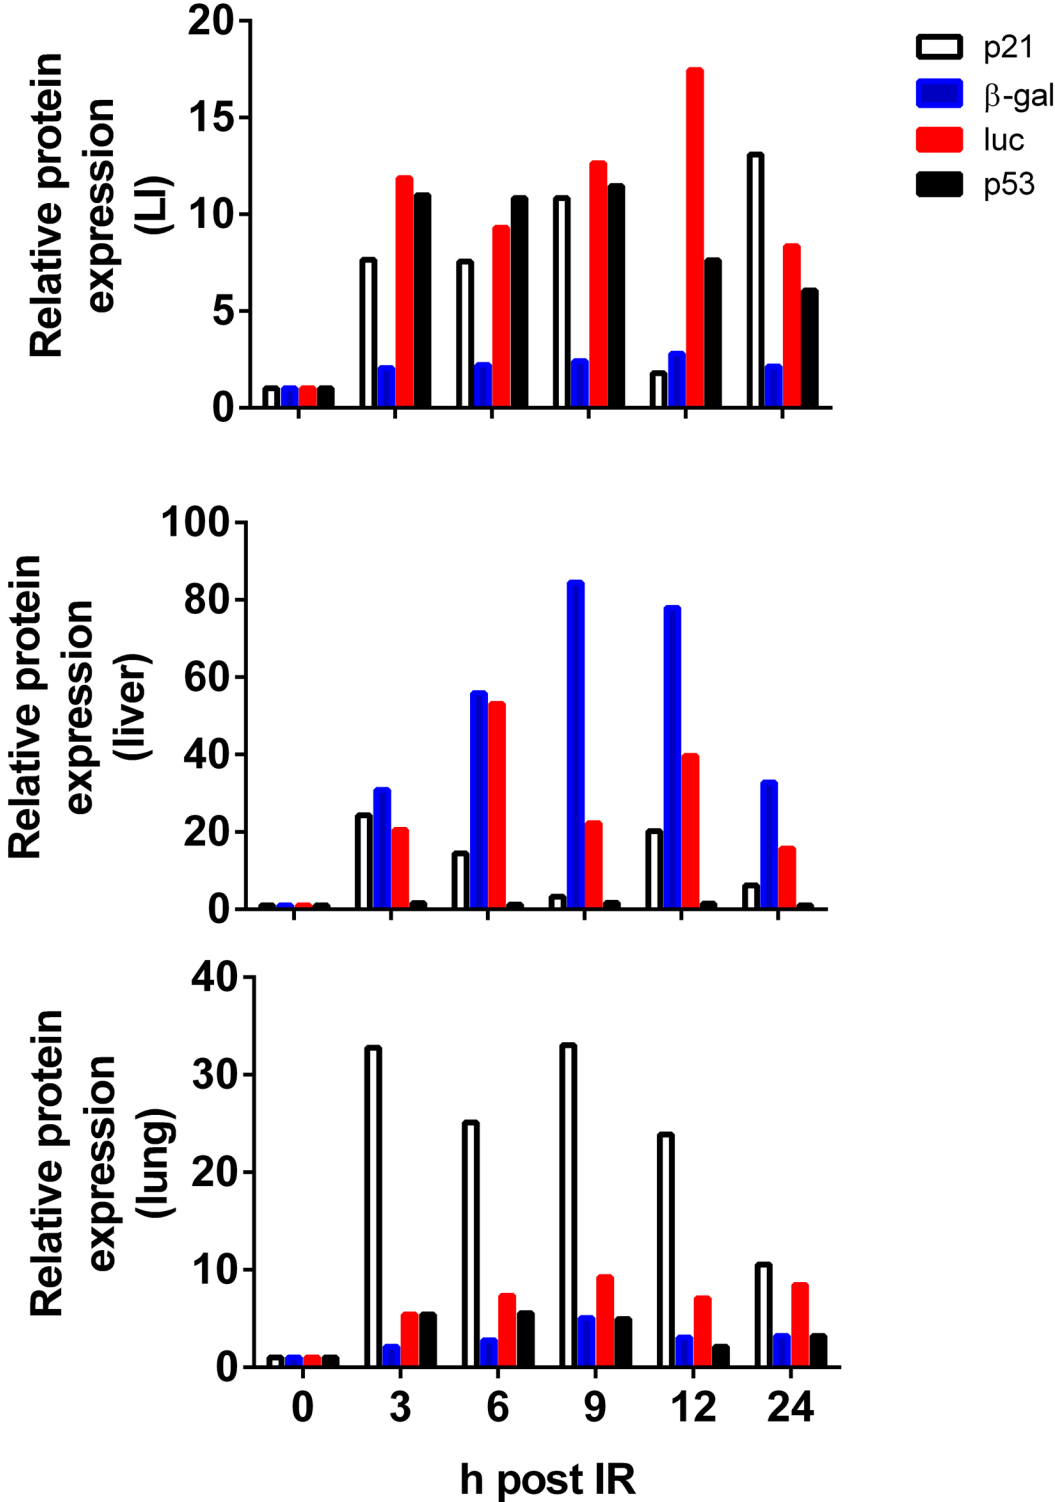

# Figure S3

CTX,  
layer 2/3

AONm

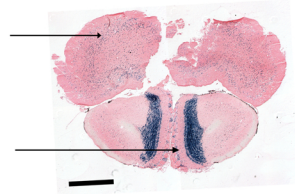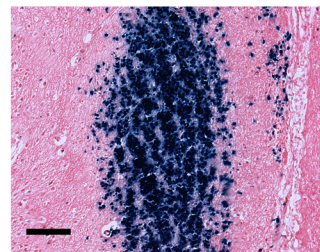

**AONm**

PIR

OTU

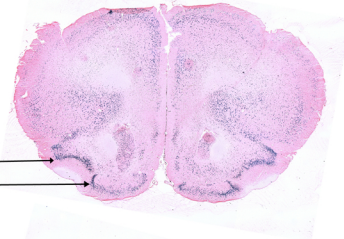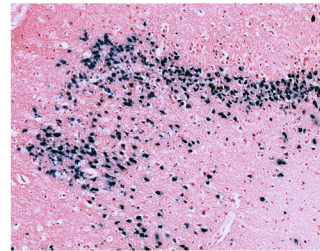

**PIR**

LV,  
ependyma

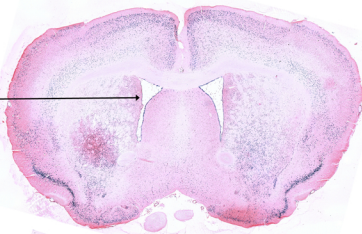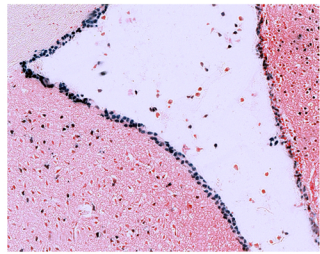

DG

HPC,  
CA3

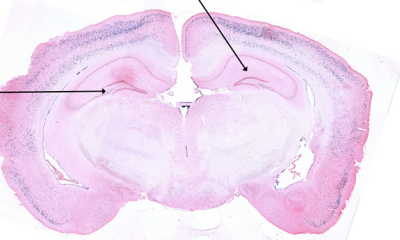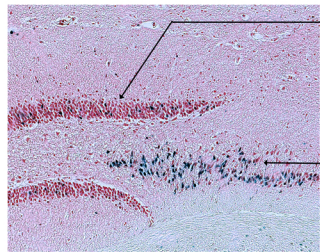

**DG**

**HPC,  
CA3**

S

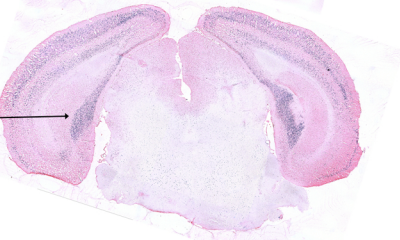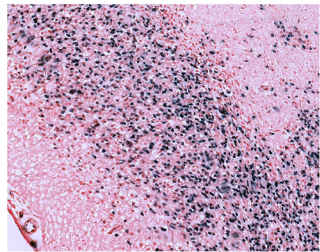

DCN

CP

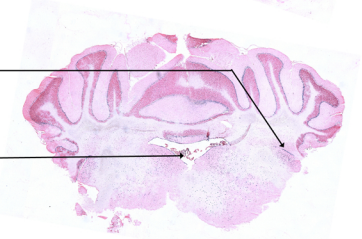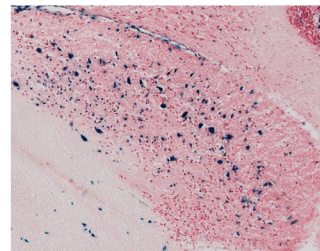

**DCN**

PCL

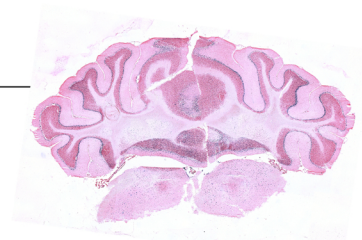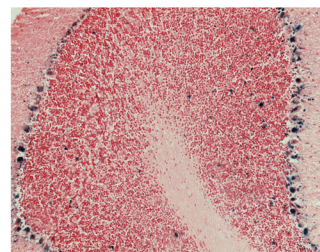

Supplement: NIHMS69963-supplement-SI_Figures_1-3.pdf [file NIHMS69963-supplement-SI_Figures_1-3.pdf]
