# Supplementary material
Source: PubMed Central journal article supplement (PMC5136472)

Figure S11

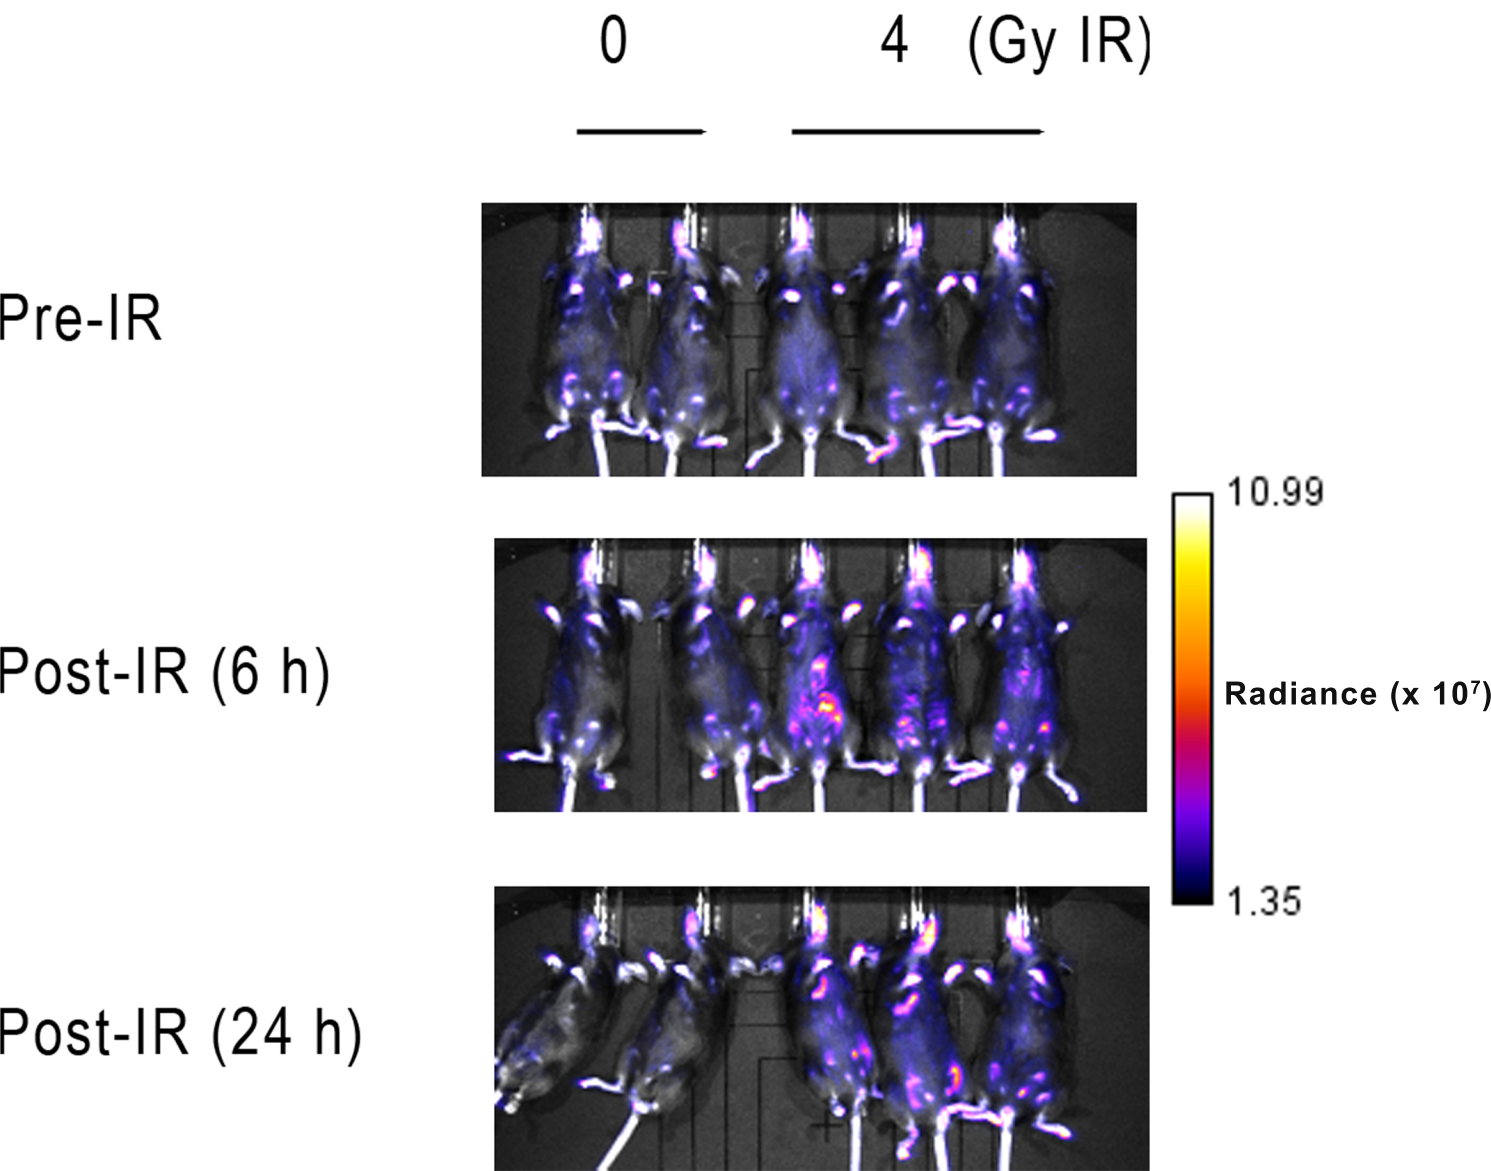

Figure S12

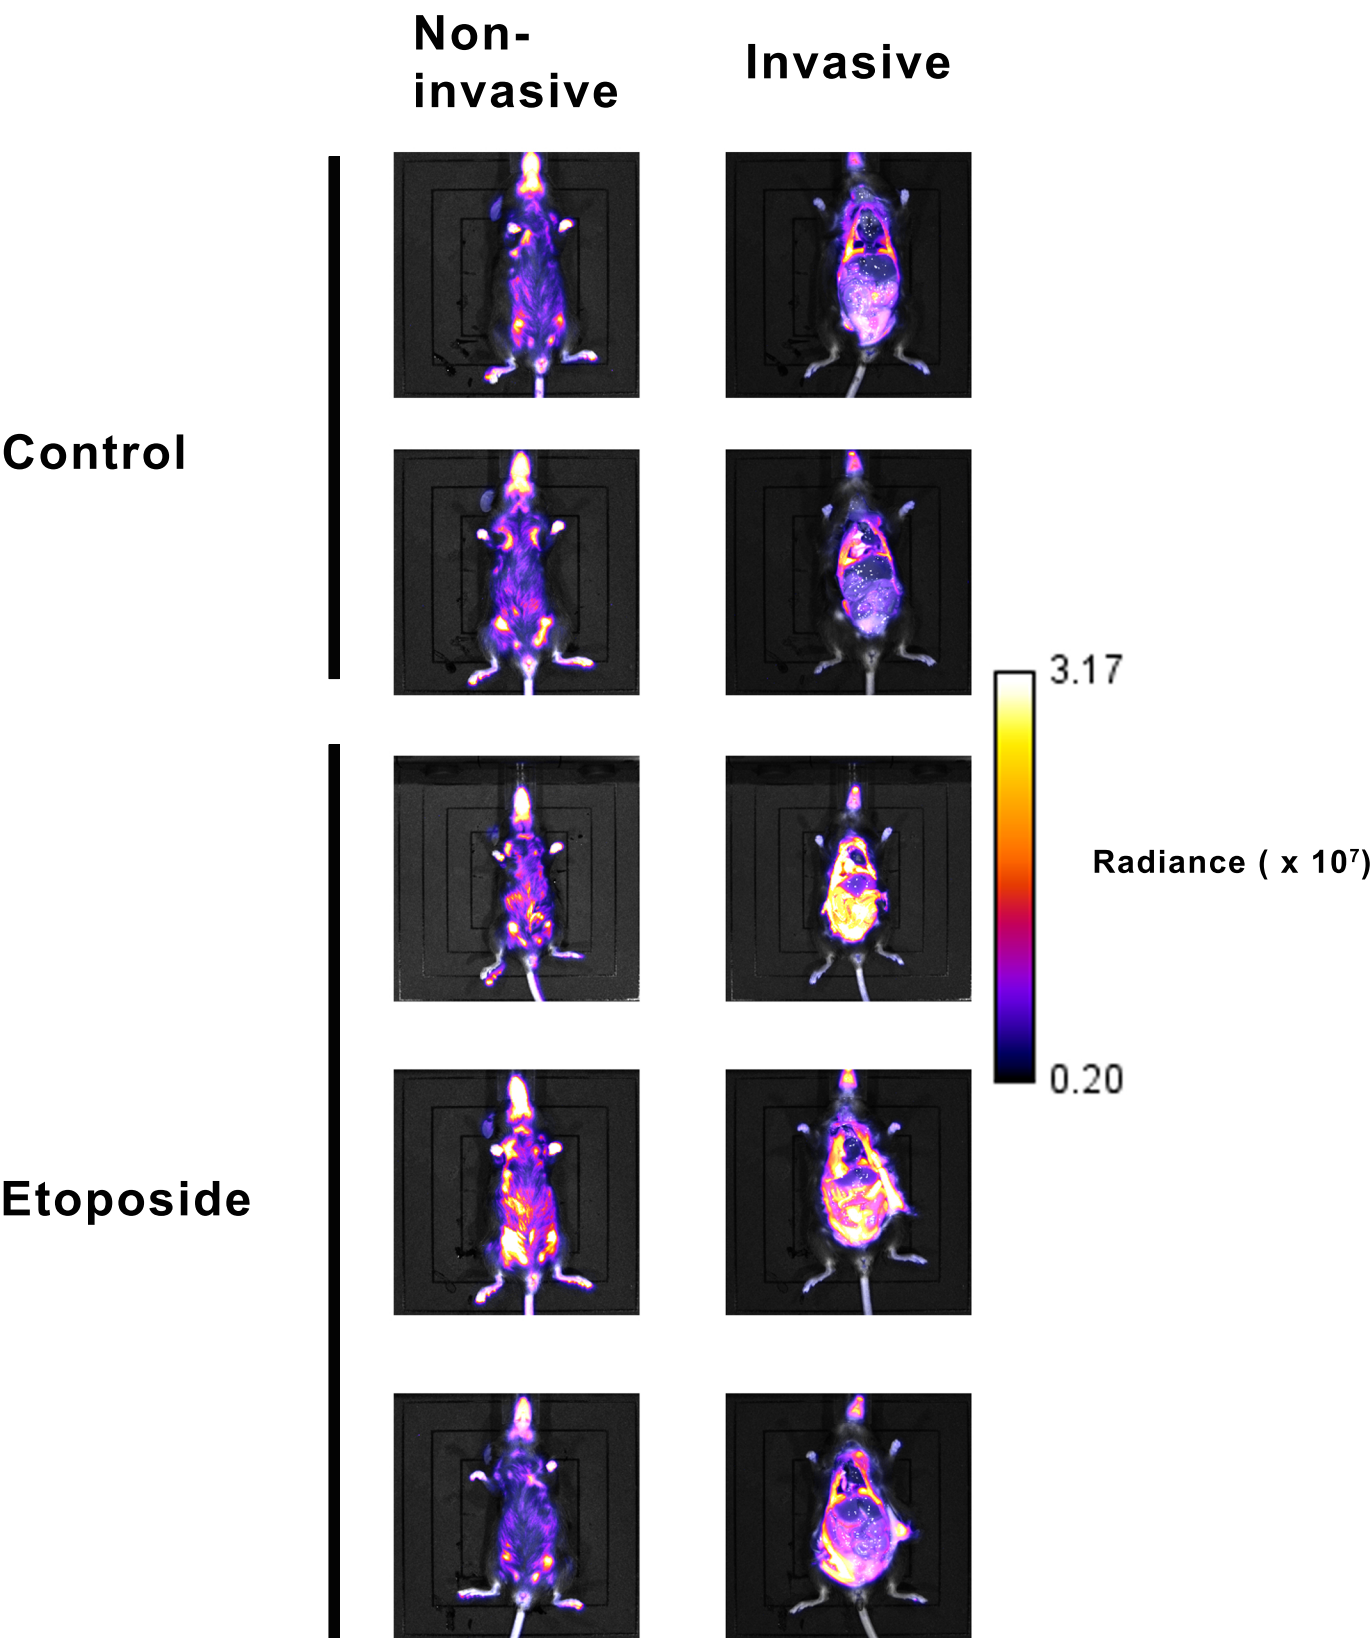

# Figure S13

A

| Olaparib dose (mg/kg) | Half-life (min) | Cmax ( $\mu\text{g/ml}$ ) | AUCall ( $\text{min}\cdot\mu\text{g/ml}$ ) | AUCinf ( $\text{min}\cdot\mu\text{g/ml}$ ) | Cl ( $\text{ml/min/kg}$ ) |
|-----------------------|-----------------|---------------------------|--------------------------------------------|--------------------------------------------|---------------------------|
| 10                    | $50 \pm 6$      | $1.0 \pm 0.4$             | $90 \pm 40$                                | $96 \pm 37$                                | $114 \pm 37$              |
| 50                    | $42 \pm 6$      | $8 \pm 2$                 | $627 \pm 120$                              | $631 \pm 120$                              | $82 \pm 17$               |
| 100                   | $56 \pm 19$     | $20 \pm 6$                | $2549 \pm 818$                             | $2582 \pm 849$                             | $41 \pm 11$               |

B

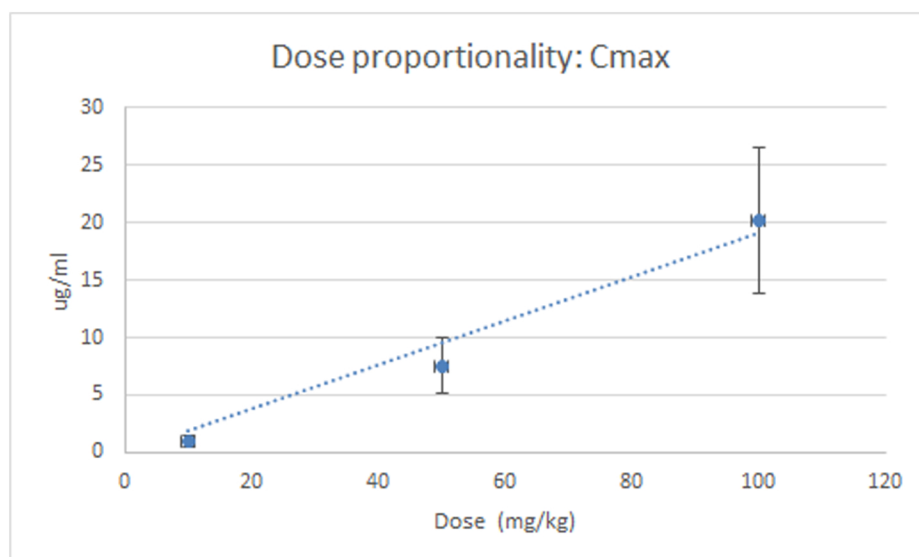

C

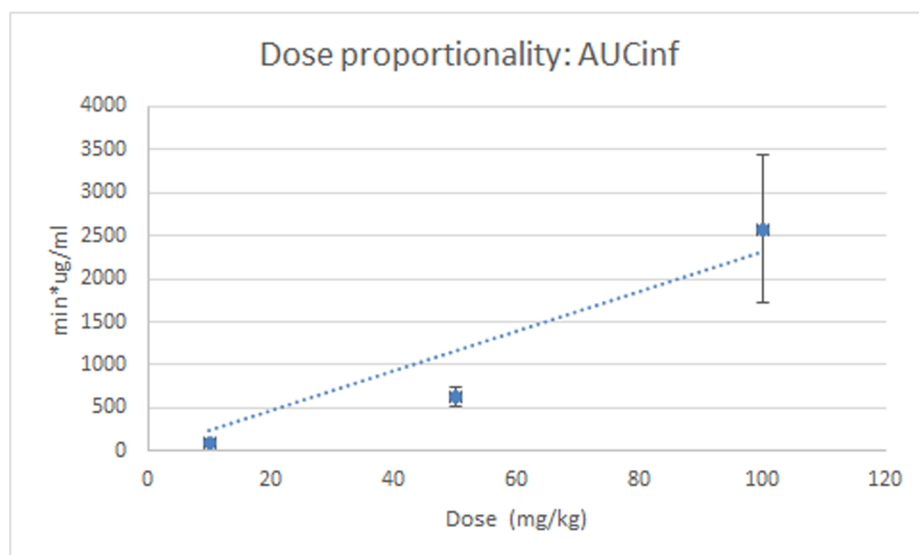

Supplement: NIHMS69963-supplement-SI_Figures_11-13.pdf [file NIHMS69963-supplement-SI_Figures_11-13.pdf]
