# Supplementary material
Source: PubMed Central journal article supplement (PMC5136472)

**Figure S10**

**CONTROL**

**ETOPOSIDE**

**SI**

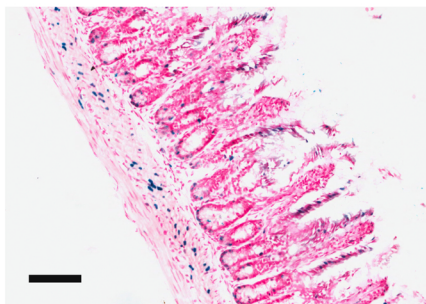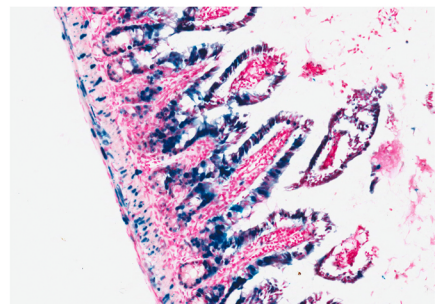

**LI**

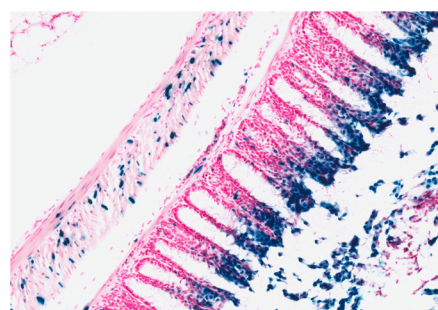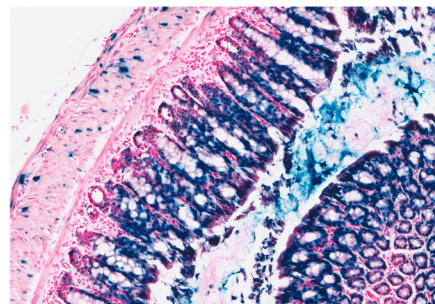

**Lung**

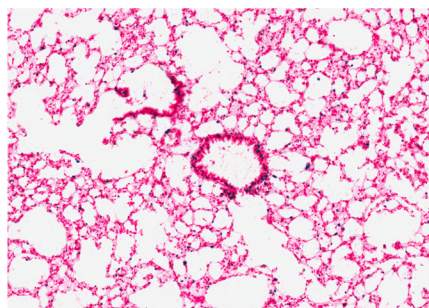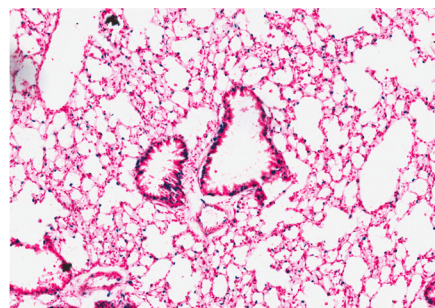

**Liver**

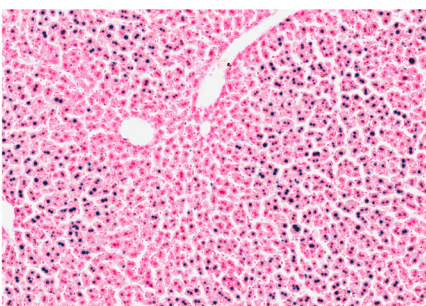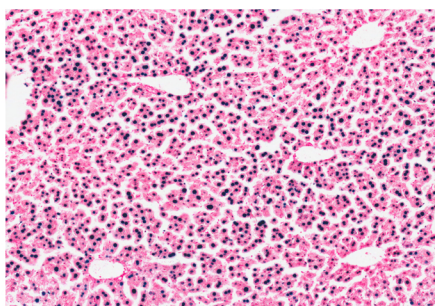

**Kidney**

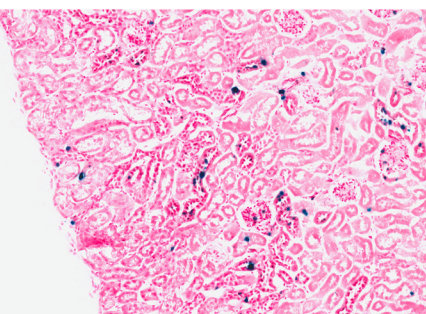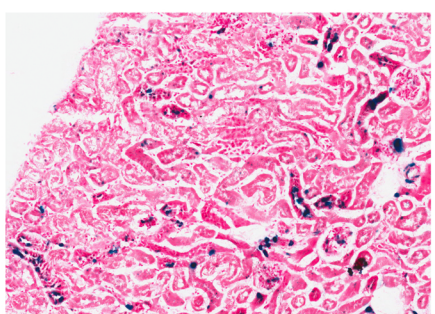

Supplement: NIHMS69963-supplement-SI_Figure_10.pdf [file NIHMS69963-supplement-SI_Figure_10.pdf]

# Figure S4

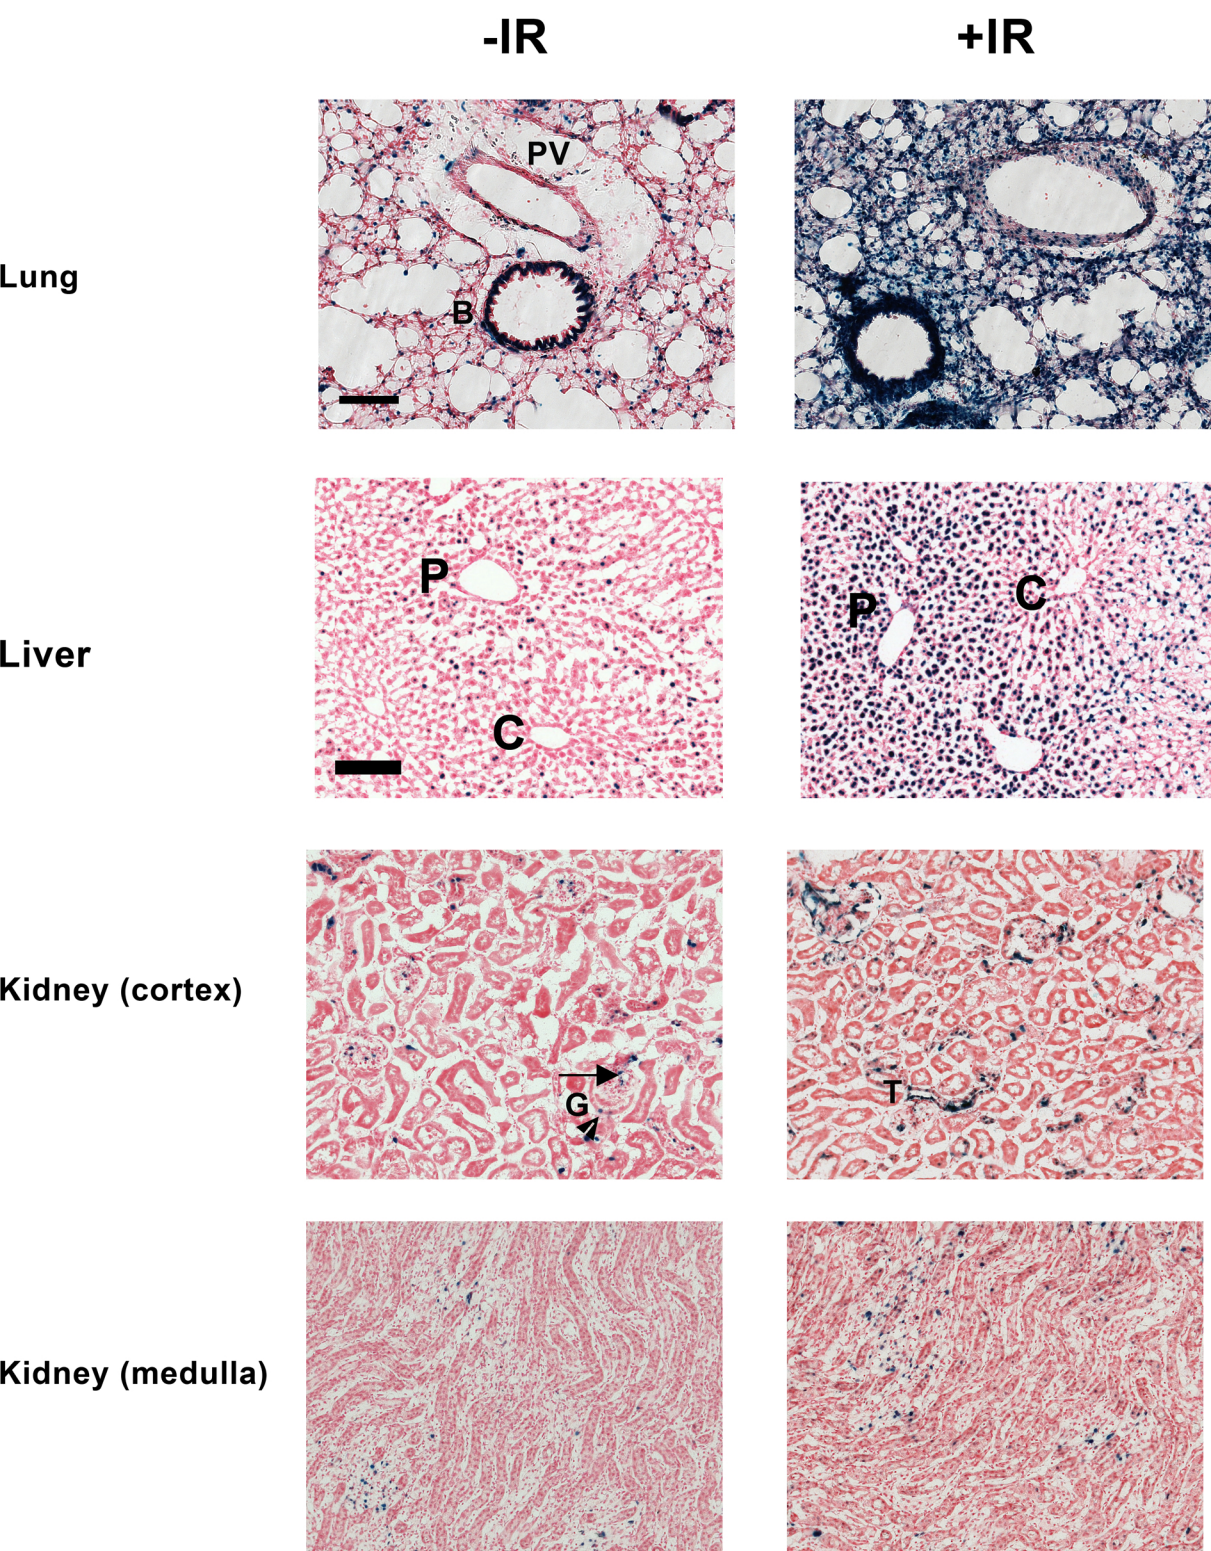

**Figure S5**

**-IR**

**+IR**

**Spleen**

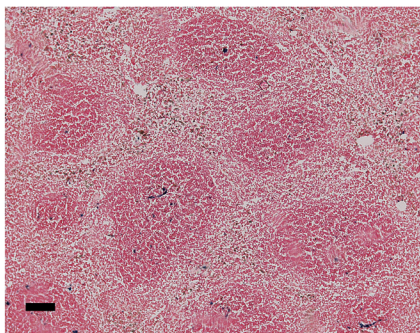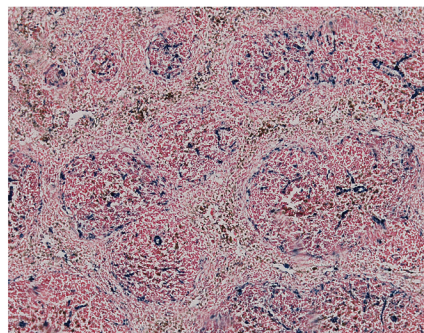

**Thymus**

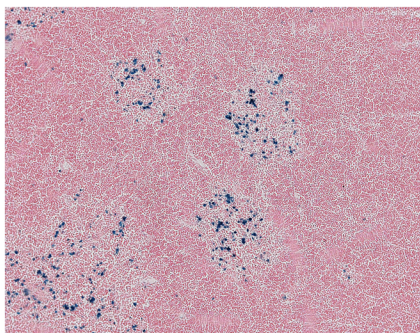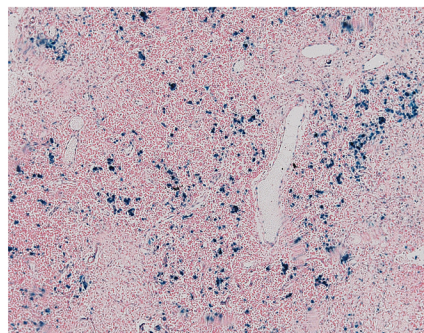

**Heart**

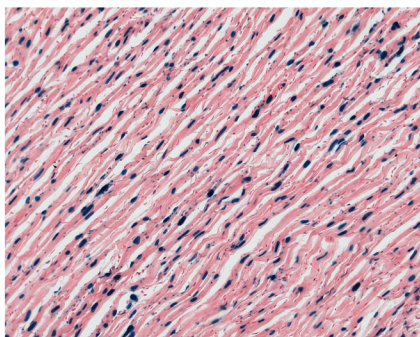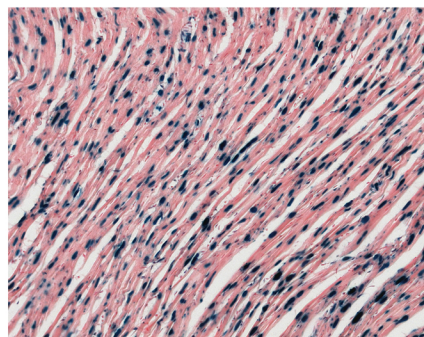

Supplement: NIHMS69963-supplement-SI_Figures_4-5.pdf [file NIHMS69963-supplement-SI_Figures_4-5.pdf]

Figure S6

-IR

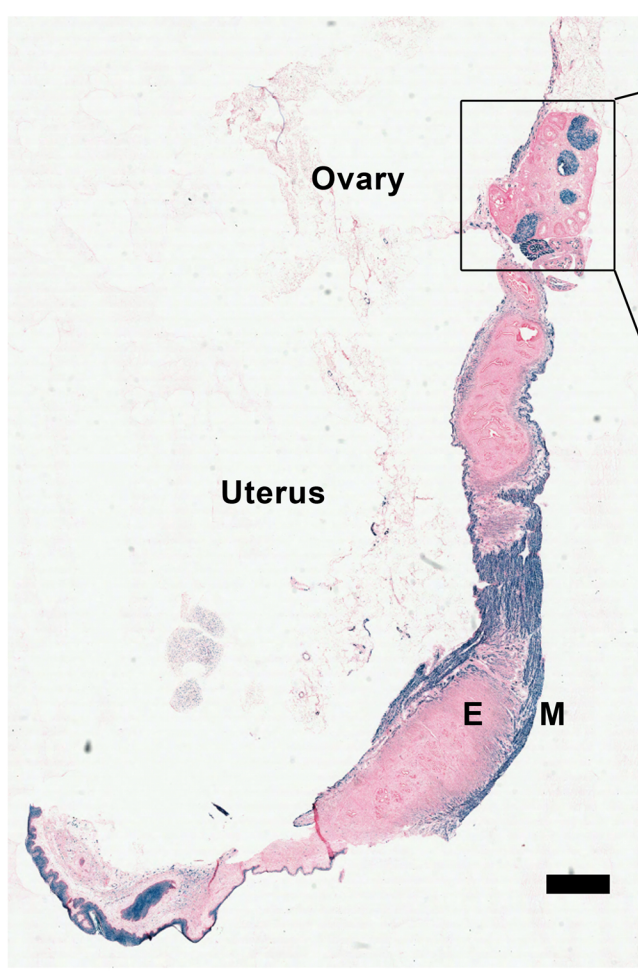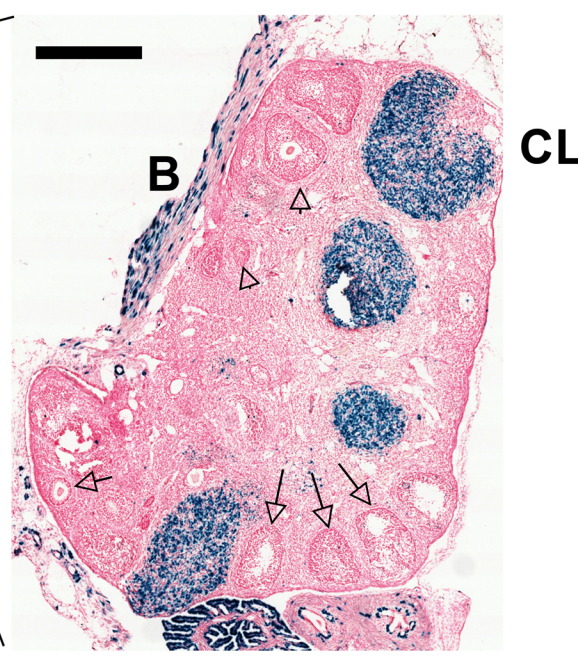

+IR

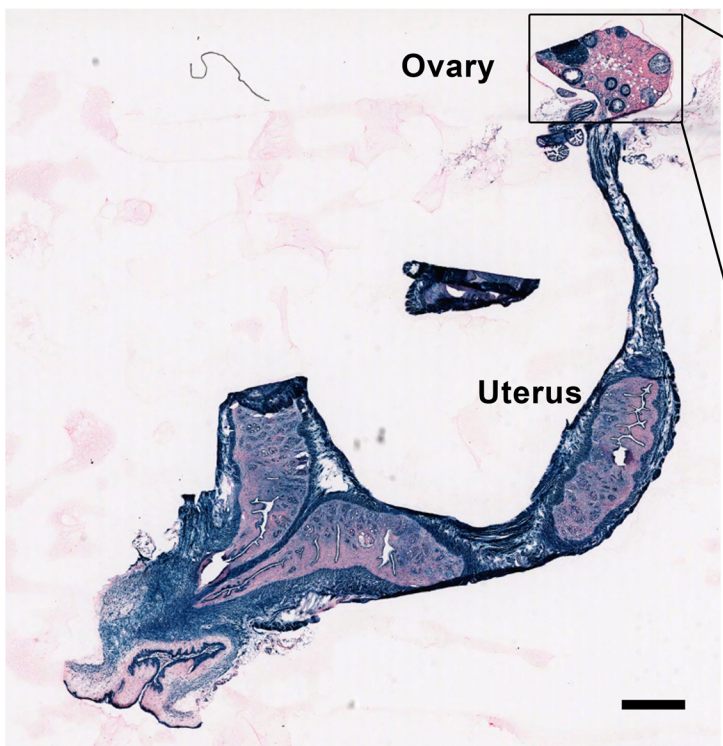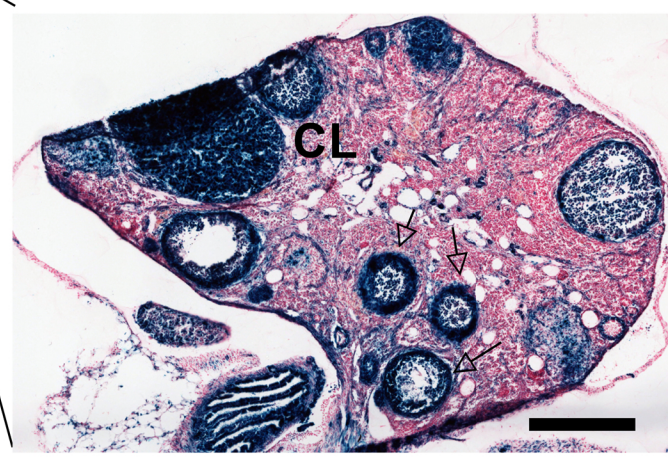

Figure S7

CONTROL

IR

Lung

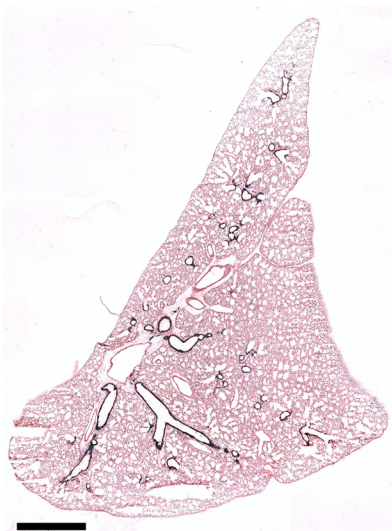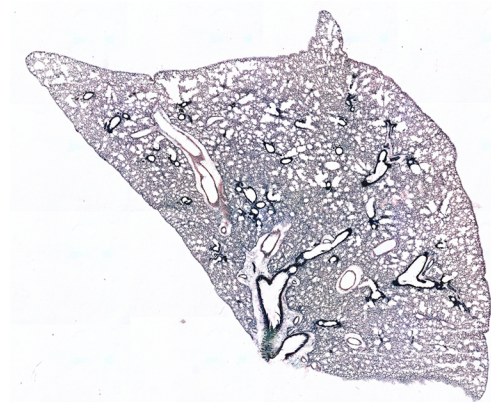

Large intestine

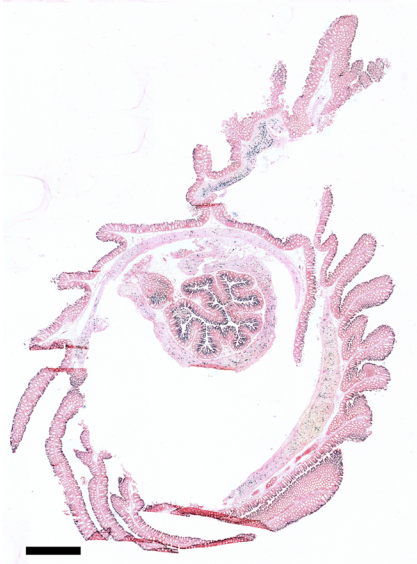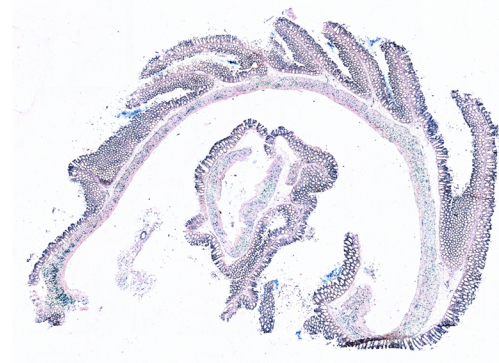

Liver

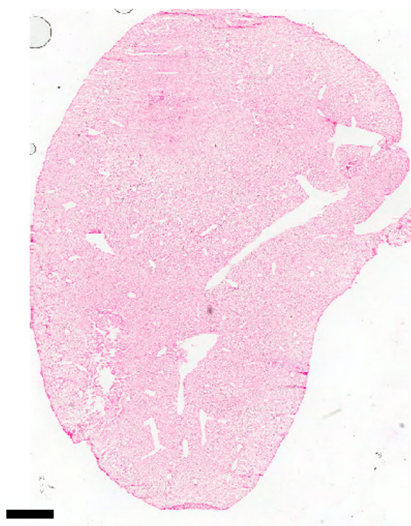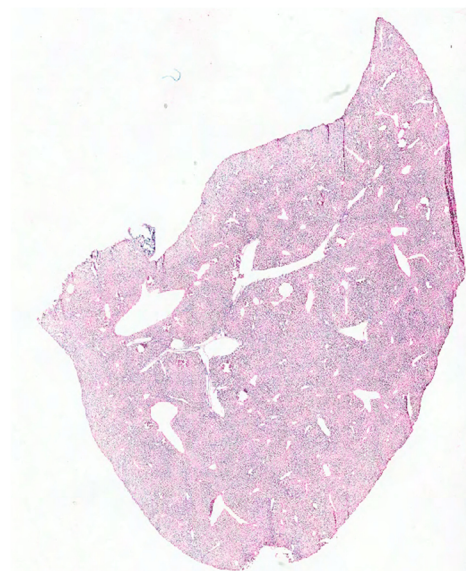

Supplement: NIHMS69963-supplement-SI_Figures_6-7.pdf [file NIHMS69963-supplement-SI_Figures_6-7.pdf]

**Figure S8**

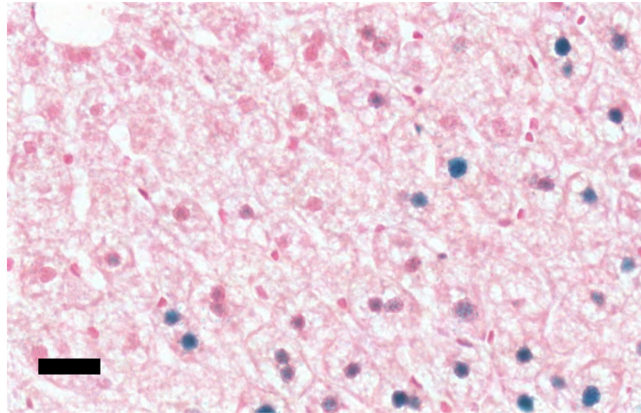

# Figure S9

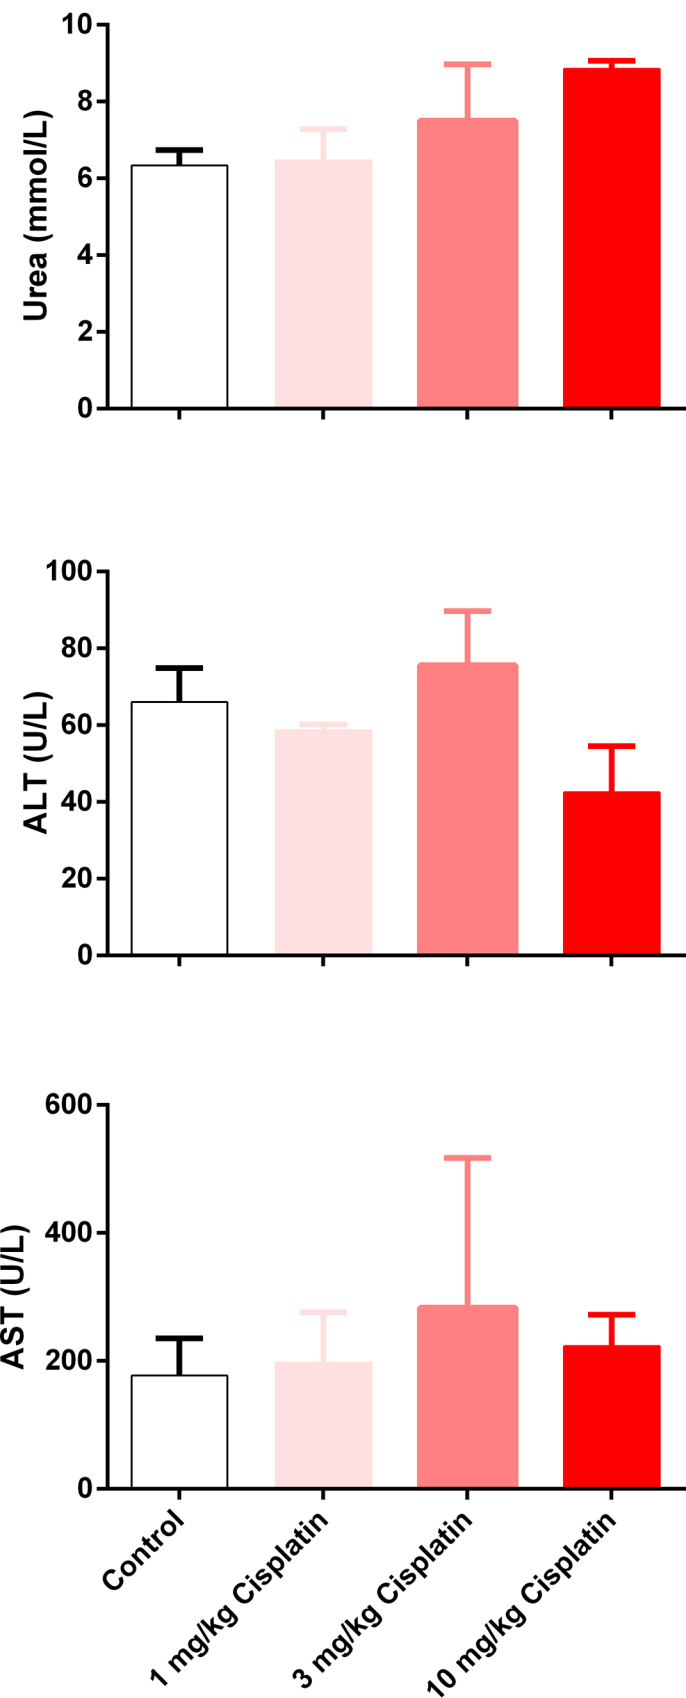

Supplement: NIHMS69963-supplement-SI_Figures_8-9.pdf [file NIHMS69963-supplement-SI_Figures_8-9.pdf]
